# Supplementary material for: Association of MMP-2 (–1306 C/T) Gene Polymorphism with Predisposition to Optic Neuritis and Optic Neuritis Together with Multiple Sclerosis
Source: PubMed Central journal article supplement (PMC6037261; doi:10.3390/medicina54020029), 2018-05-07
Supplement: medicina-54-00029-s001.pdf [file medicina-54-00029-s001.pdf]

**Supplementary material**

*Table S1.* Binomial logistic regression analysis in patients with optic neuritis (ON) and in the control group.

| <b>Model</b>         | <b>Genotype/allele</b> | <b>OR (CI 95%)</b>  | <b>P value</b> | <b>AIC</b> |
|----------------------|------------------------|---------------------|----------------|------------|
| <b>ON without MS</b> |                        |                     |                |            |
|                      | C/C                    | 1                   |                |            |
| Co-dominant          | C/T                    | 0.774 (0.367-1.635) | 0.502          | 231.899    |
|                      | T/T                    | 0                   | 0.998          |            |
| Dominant             | T/C+T/T vs. C/C        | 0.653 (0.310-1.374) | 0.262          | 233.472    |
| Recessive            | T/T vs. C/C+C/T        | 0                   | 0.998          | 230.361    |
| Over-dominant        | T/C vs. T/T+C/C        | 0.856 (0.406-1.804) | 0.682          | 234.614    |
| Additive             | T                      | 0.603 (0.090-0.962) | 0.134          | 232.293    |
| <b>ON with MS</b>    |                        |                     |                |            |
|                      | C/C                    | 1                   |                |            |
| Co-dominant          | C/T                    | 0.648 (0.264-1.591) | 0.344          | 184.289    |
|                      | T/T                    | 0                   | 0.998          |            |
| Dominant             | T/C+T/T vs. CC         | 0.547 (0.223-1.339) | 0.186          | 184.400    |
| Recessive            | T/T vs. C/C+C/T        | 0                   | 0.998          | 183.033    |
| Over-dominant        | T/C vs. T/T+C/C        | 0.716 (0.292-1.757) | 0.466          | 185.722    |
| Additive             | T                      | 0.524 (0.233-1.176) | 0.117          | 183.429    |

MS-multiple sclerosis, ON-optic neuritis, OR-odd ratio, CI-confidence interval, p value – significance level (alfa=0.05), AIC- Akaike Information Criterion.
